# Supplementary material for: Improving detection of protein-ligand binding sites with 3D segmentation
Source: PubMed Central journal article supplement (PMC7081267; doi:10.1038/s41598-020-61860-z), 2020-03-19
Supplement: 41598_2020_61860_MOESM1_ESM.pdf [file 41598_2020_61860_MOESM1_ESM.pdf]

# Improving detection of protein-ligand binding sites with 3D segmentation.

Marta M. Stepniewska-Dziubinska<sup>1</sup>, Piotr Zielenkiewicz<sup>1,2</sup>, and Pawel Siedlecki<sup>1,2,\*</sup>

<sup>1</sup>Institute of Biochemistry and Biophysics, Polish Academy of Sciences, Pawinskiego 5a, 02-106 Warsaw, Poland

<sup>2</sup>Department of Systems Biology, Institute of Experimental Plant Biology and Biotechnology, University of Warsaw, Miecznikowa 1, 02-096 Warsaw, Poland

\*pawel@ibb.waw.pl

## Supplementary Information

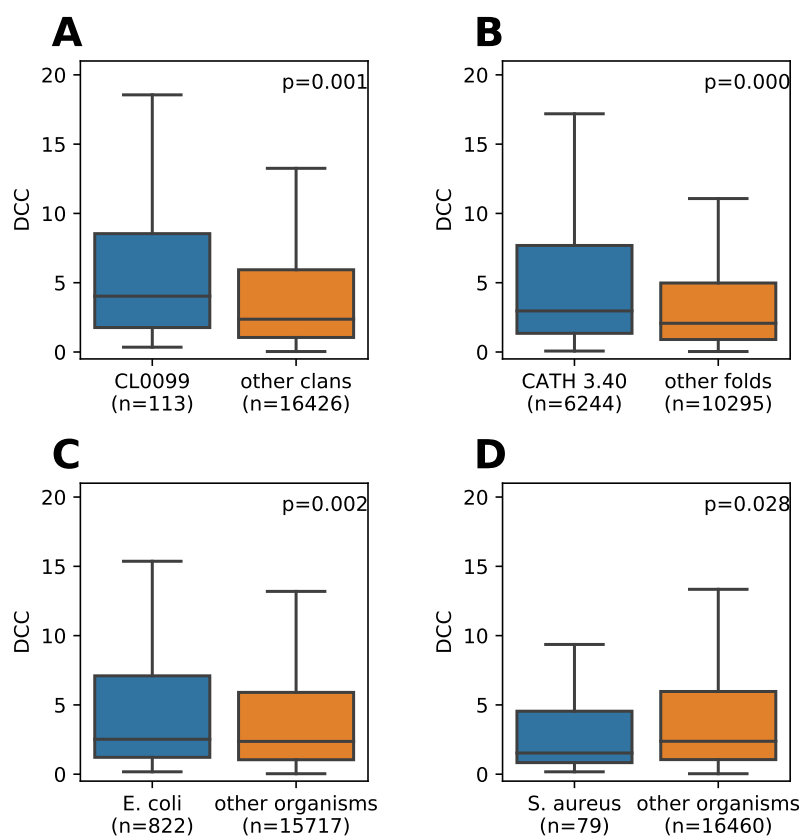

**Supplementary Figure S1.** Relationship between prediction accuracy and protein properties: superfamily (A), fold (B), and source organism (C and D). “n” denotes number of binding sites in each group. p-values were calculated with Mann-Whitney U-test.
